# Supplementary material for: Will perioperative pembrolizumab treatment change perioperative treatment strategies for resectable non-small cell lung cancer?
Source: PubMed Central journal article supplement — Transl Lung Cancer Res. 2024 Jan 11;13(1):205–9. doi: 10.21037/tlcr-23-578 (PMC10891397; doi:10.21037/tlcr-23-578), 2024-01-11
Supplement: tlcr-13-01-205-coif.pdf [file tlcr-13-01-205-coif.pdf]

## ICMJE DISCLOSURE FORM

**Date:** 12/9/2023

**Your Name:** Shuji Murakami

**Manuscript Title:** Will perioperative pembrolizumab treatment change perioperative treatment strategies for resectable NSCLC?

**Manuscript Number (if known):** TLCR-23-578

In the interest of transparency, we ask you to disclose all relationships/activities/interests listed below that are related to the content of your manuscript. "Related" means any relation with for-profit or not-for-profit third parties whose interests may be affected by the content of the manuscript. Disclosure represents a commitment to transparency and does not necessarily indicate a bias. If you are in doubt about whether to list a relationship/activity/interest, it is preferable that you do so.

The author's relationships/activities/interests should be defined broadly. For example, if your manuscript pertains to the epidemiology of hypertension, you should declare all relationships with manufacturers of antihypertensive medication, even if that medication is not mentioned in the manuscript.

In item #1 below, report all support for the work reported in this manuscript without time limit. For all other items, the time frame for disclosure is the past 36 months.

|                                                    | Name all entities with whom you have this relationship or indicate none (add rows as needed)                                                                                   | Specifications/Comments (e.g., if payments were made to you or to your institution)                                                                                                                                                                                                                                                                                                                                                                                                                                                                                                                                                                                                            |             |             |  |        |             |  |               |             |  |        |             |  |     |             |  |                |             |  |                    |             |  |                |             |  |
|----------------------------------------------------|--------------------------------------------------------------------------------------------------------------------------------------------------------------------------------|------------------------------------------------------------------------------------------------------------------------------------------------------------------------------------------------------------------------------------------------------------------------------------------------------------------------------------------------------------------------------------------------------------------------------------------------------------------------------------------------------------------------------------------------------------------------------------------------------------------------------------------------------------------------------------------------|-------------|-------------|--|--------|-------------|--|---------------|-------------|--|--------|-------------|--|-----|-------------|--|----------------|-------------|--|--------------------|-------------|--|----------------|-------------|--|
| Time frame: Since the initial planning of the work |                                                                                                                                                                                |                                                                                                                                                                                                                                                                                                                                                                                                                                                                                                                                                                                                                                                                                                |             |             |  |        |             |  |               |             |  |        |             |  |     |             |  |                |             |  |                    |             |  |                |             |  |
| <b>1</b>                                           | All support for the present manuscript (e.g., funding, provision of study materials, medical writing, article processing charges, etc.)<br><b>No time limit for this item.</b> | <input checked="" type="checkbox"/> <b>None</b><br><table border="1" style="width: 100%; border-collapse: collapse; margin-top: 10px;"> <tr><td style="height: 20px;"> </td><td style="width: 20px;"> </td></tr> <tr><td style="height: 20px;"> </td><td style="width: 20px;"> </td></tr> <tr><td style="height: 20px;"> </td><td style="width: 20px;"> </td></tr> </table> <p style="font-size: small; text-align: right; margin-top: 5px;">Click the tab key to add additional rows.</p>                                                                                                                                                                                                     |             |             |  |        |             |  |               |             |  |        |             |  |     |             |  |                |             |  |                    |             |  |                |             |  |
|                                                    |                                                                                                                                                                                |                                                                                                                                                                                                                                                                                                                                                                                                                                                                                                                                                                                                                                                                                                |             |             |  |        |             |  |               |             |  |        |             |  |     |             |  |                |             |  |                    |             |  |                |             |  |
|                                                    |                                                                                                                                                                                |                                                                                                                                                                                                                                                                                                                                                                                                                                                                                                                                                                                                                                                                                                |             |             |  |        |             |  |               |             |  |        |             |  |     |             |  |                |             |  |                    |             |  |                |             |  |
|                                                    |                                                                                                                                                                                |                                                                                                                                                                                                                                                                                                                                                                                                                                                                                                                                                                                                                                                                                                |             |             |  |        |             |  |               |             |  |        |             |  |     |             |  |                |             |  |                    |             |  |                |             |  |
| Time frame: past 36 months                         |                                                                                                                                                                                |                                                                                                                                                                                                                                                                                                                                                                                                                                                                                                                                                                                                                                                                                                |             |             |  |        |             |  |               |             |  |        |             |  |     |             |  |                |             |  |                    |             |  |                |             |  |
| <b>2</b>                                           | Grants or contracts from any entity (if not indicated in item #1 above).                                                                                                       | <input type="checkbox"/> <b>None</b><br><table border="1" style="width: 100%; border-collapse: collapse; margin-top: 10px;"> <tr><td style="width: 60%;">AstraZeneca</td><td style="width: 20%;">Institution</td><td style="width: 20%;"> </td></tr> <tr><td>Takeda</td><td>Institution</td><td> </td></tr> <tr><td>Chugai Pharma</td><td>Institution</td><td> </td></tr> <tr><td>Sanofi</td><td>Institution</td><td> </td></tr> <tr><td>MSD</td><td>Institution</td><td> </td></tr> <tr><td>Daiichi Sankyo</td><td>Institution</td><td> </td></tr> <tr><td>Ono Pharmaceutical</td><td>Institution</td><td> </td></tr> <tr><td>Janssen Pharma</td><td>Institution</td><td> </td></tr> </table> | AstraZeneca | Institution |  | Takeda | Institution |  | Chugai Pharma | Institution |  | Sanofi | Institution |  | MSD | Institution |  | Daiichi Sankyo | Institution |  | Ono Pharmaceutical | Institution |  | Janssen Pharma | Institution |  |
| AstraZeneca                                        | Institution                                                                                                                                                                    |                                                                                                                                                                                                                                                                                                                                                                                                                                                                                                                                                                                                                                                                                                |             |             |  |        |             |  |               |             |  |        |             |  |     |             |  |                |             |  |                    |             |  |                |             |  |
| Takeda                                             | Institution                                                                                                                                                                    |                                                                                                                                                                                                                                                                                                                                                                                                                                                                                                                                                                                                                                                                                                |             |             |  |        |             |  |               |             |  |        |             |  |     |             |  |                |             |  |                    |             |  |                |             |  |
| Chugai Pharma                                      | Institution                                                                                                                                                                    |                                                                                                                                                                                                                                                                                                                                                                                                                                                                                                                                                                                                                                                                                                |             |             |  |        |             |  |               |             |  |        |             |  |     |             |  |                |             |  |                    |             |  |                |             |  |
| Sanofi                                             | Institution                                                                                                                                                                    |                                                                                                                                                                                                                                                                                                                                                                                                                                                                                                                                                                                                                                                                                                |             |             |  |        |             |  |               |             |  |        |             |  |     |             |  |                |             |  |                    |             |  |                |             |  |
| MSD                                                | Institution                                                                                                                                                                    |                                                                                                                                                                                                                                                                                                                                                                                                                                                                                                                                                                                                                                                                                                |             |             |  |        |             |  |               |             |  |        |             |  |     |             |  |                |             |  |                    |             |  |                |             |  |
| Daiichi Sankyo                                     | Institution                                                                                                                                                                    |                                                                                                                                                                                                                                                                                                                                                                                                                                                                                                                                                                                                                                                                                                |             |             |  |        |             |  |               |             |  |        |             |  |     |             |  |                |             |  |                    |             |  |                |             |  |
| Ono Pharmaceutical                                 | Institution                                                                                                                                                                    |                                                                                                                                                                                                                                                                                                                                                                                                                                                                                                                                                                                                                                                                                                |             |             |  |        |             |  |               |             |  |        |             |  |     |             |  |                |             |  |                    |             |  |                |             |  |
| Janssen Pharma                                     | Institution                                                                                                                                                                    |                                                                                                                                                                                                                                                                                                                                                                                                                                                                                                                                                                                                                                                                                                |             |             |  |        |             |  |               |             |  |        |             |  |     |             |  |                |             |  |                    |             |  |                |             |  |

|                      |                                                                                                              | Name all entities with whom you have this relationship or indicate none (add rows as needed)                                                                                                                                                                                                                                                                                                    | Specifications/Comments (e.g., if payments were made to you or to your institution) |    |               |    |        |    |           |    |     |    |        |    |          |    |                      |    |  |
|----------------------|--------------------------------------------------------------------------------------------------------------|-------------------------------------------------------------------------------------------------------------------------------------------------------------------------------------------------------------------------------------------------------------------------------------------------------------------------------------------------------------------------------------------------|-------------------------------------------------------------------------------------|----|---------------|----|--------|----|-----------|----|-----|----|--------|----|----------|----|----------------------|----|--|
| 3                    | Royalties or licenses                                                                                        | <input checked="" type="checkbox"/> <b>None</b><br><table border="1"> <tr><td></td><td></td></tr> <tr><td></td><td></td></tr> <tr><td></td><td></td></tr> </table>                                                                                                                                                                                                                              |                                                                                     |    |               |    |        |    |           |    |     |    |        |    |          |    |                      |    |  |
|                      |                                                                                                              |                                                                                                                                                                                                                                                                                                                                                                                                 |                                                                                     |    |               |    |        |    |           |    |     |    |        |    |          |    |                      |    |  |
|                      |                                                                                                              |                                                                                                                                                                                                                                                                                                                                                                                                 |                                                                                     |    |               |    |        |    |           |    |     |    |        |    |          |    |                      |    |  |
|                      |                                                                                                              |                                                                                                                                                                                                                                                                                                                                                                                                 |                                                                                     |    |               |    |        |    |           |    |     |    |        |    |          |    |                      |    |  |
| 4                    | Consulting fees                                                                                              | <input checked="" type="checkbox"/> <b>None</b><br><table border="1"> <tr><td></td><td></td></tr> <tr><td></td><td></td></tr> <tr><td></td><td></td></tr> </table>                                                                                                                                                                                                                              |                                                                                     |    |               |    |        |    |           |    |     |    |        |    |          |    |                      |    |  |
|                      |                                                                                                              |                                                                                                                                                                                                                                                                                                                                                                                                 |                                                                                     |    |               |    |        |    |           |    |     |    |        |    |          |    |                      |    |  |
|                      |                                                                                                              |                                                                                                                                                                                                                                                                                                                                                                                                 |                                                                                     |    |               |    |        |    |           |    |     |    |        |    |          |    |                      |    |  |
|                      |                                                                                                              |                                                                                                                                                                                                                                                                                                                                                                                                 |                                                                                     |    |               |    |        |    |           |    |     |    |        |    |          |    |                      |    |  |
| 5                    | Payment or honoraria for lectures, presentations, speakers bureaus, manuscript writing or educational events | <input type="checkbox"/> <b>None</b><br><table border="1"> <tr><td>AstraZeneca</td><td>Me</td></tr> <tr><td>Chugai Pharma</td><td>Me</td></tr> <tr><td>Takeda</td><td>Me</td></tr> <tr><td>Eli Lilly</td><td>Me</td></tr> <tr><td>MSD</td><td>Me</td></tr> <tr><td>Pfizer</td><td>Me</td></tr> <tr><td>Novartis</td><td>Me</td></tr> <tr><td>Taiho Pharmaceutical</td><td>Me</td></tr> </table> | AstraZeneca                                                                         | Me | Chugai Pharma | Me | Takeda | Me | Eli Lilly | Me | MSD | Me | Pfizer | Me | Novartis | Me | Taiho Pharmaceutical | Me |  |
| AstraZeneca          | Me                                                                                                           |                                                                                                                                                                                                                                                                                                                                                                                                 |                                                                                     |    |               |    |        |    |           |    |     |    |        |    |          |    |                      |    |  |
| Chugai Pharma        | Me                                                                                                           |                                                                                                                                                                                                                                                                                                                                                                                                 |                                                                                     |    |               |    |        |    |           |    |     |    |        |    |          |    |                      |    |  |
| Takeda               | Me                                                                                                           |                                                                                                                                                                                                                                                                                                                                                                                                 |                                                                                     |    |               |    |        |    |           |    |     |    |        |    |          |    |                      |    |  |
| Eli Lilly            | Me                                                                                                           |                                                                                                                                                                                                                                                                                                                                                                                                 |                                                                                     |    |               |    |        |    |           |    |     |    |        |    |          |    |                      |    |  |
| MSD                  | Me                                                                                                           |                                                                                                                                                                                                                                                                                                                                                                                                 |                                                                                     |    |               |    |        |    |           |    |     |    |        |    |          |    |                      |    |  |
| Pfizer               | Me                                                                                                           |                                                                                                                                                                                                                                                                                                                                                                                                 |                                                                                     |    |               |    |        |    |           |    |     |    |        |    |          |    |                      |    |  |
| Novartis             | Me                                                                                                           |                                                                                                                                                                                                                                                                                                                                                                                                 |                                                                                     |    |               |    |        |    |           |    |     |    |        |    |          |    |                      |    |  |
| Taiho Pharmaceutical | Me                                                                                                           |                                                                                                                                                                                                                                                                                                                                                                                                 |                                                                                     |    |               |    |        |    |           |    |     |    |        |    |          |    |                      |    |  |
| 6                    | Payment for expert testimony                                                                                 | <input checked="" type="checkbox"/> <b>None</b><br><table border="1"> <tr><td></td><td></td></tr> <tr><td></td><td></td></tr> <tr><td></td><td></td></tr> </table>                                                                                                                                                                                                                              |                                                                                     |    |               |    |        |    |           |    |     |    |        |    |          |    |                      |    |  |
|                      |                                                                                                              |                                                                                                                                                                                                                                                                                                                                                                                                 |                                                                                     |    |               |    |        |    |           |    |     |    |        |    |          |    |                      |    |  |
|                      |                                                                                                              |                                                                                                                                                                                                                                                                                                                                                                                                 |                                                                                     |    |               |    |        |    |           |    |     |    |        |    |          |    |                      |    |  |
|                      |                                                                                                              |                                                                                                                                                                                                                                                                                                                                                                                                 |                                                                                     |    |               |    |        |    |           |    |     |    |        |    |          |    |                      |    |  |
| 7                    | Support for attending meetings and/or travel                                                                 | <input checked="" type="checkbox"/> <b>None</b><br><table border="1"> <tr><td></td><td></td></tr> <tr><td></td><td></td></tr> <tr><td></td><td></td></tr> </table>                                                                                                                                                                                                                              |                                                                                     |    |               |    |        |    |           |    |     |    |        |    |          |    |                      |    |  |
|                      |                                                                                                              |                                                                                                                                                                                                                                                                                                                                                                                                 |                                                                                     |    |               |    |        |    |           |    |     |    |        |    |          |    |                      |    |  |
|                      |                                                                                                              |                                                                                                                                                                                                                                                                                                                                                                                                 |                                                                                     |    |               |    |        |    |           |    |     |    |        |    |          |    |                      |    |  |
|                      |                                                                                                              |                                                                                                                                                                                                                                                                                                                                                                                                 |                                                                                     |    |               |    |        |    |           |    |     |    |        |    |          |    |                      |    |  |
| 8                    | Patents planned, issued or pending                                                                           | <input checked="" type="checkbox"/> <b>None</b><br><table border="1"> <tr><td></td><td></td></tr> <tr><td></td><td></td></tr> <tr><td></td><td></td></tr> </table>                                                                                                                                                                                                                              |                                                                                     |    |               |    |        |    |           |    |     |    |        |    |          |    |                      |    |  |
|                      |                                                                                                              |                                                                                                                                                                                                                                                                                                                                                                                                 |                                                                                     |    |               |    |        |    |           |    |     |    |        |    |          |    |                      |    |  |
|                      |                                                                                                              |                                                                                                                                                                                                                                                                                                                                                                                                 |                                                                                     |    |               |    |        |    |           |    |     |    |        |    |          |    |                      |    |  |
|                      |                                                                                                              |                                                                                                                                                                                                                                                                                                                                                                                                 |                                                                                     |    |               |    |        |    |           |    |     |    |        |    |          |    |                      |    |  |
| 9                    | Participation on a Data Safety Monitoring Board or Advisory Board                                            | <input checked="" type="checkbox"/> <b>None</b><br><table border="1"> <tr><td></td><td></td></tr> <tr><td></td><td></td></tr> <tr><td></td><td></td></tr> </table>                                                                                                                                                                                                                              |                                                                                     |    |               |    |        |    |           |    |     |    |        |    |          |    |                      |    |  |
|                      |                                                                                                              |                                                                                                                                                                                                                                                                                                                                                                                                 |                                                                                     |    |               |    |        |    |           |    |     |    |        |    |          |    |                      |    |  |
|                      |                                                                                                              |                                                                                                                                                                                                                                                                                                                                                                                                 |                                                                                     |    |               |    |        |    |           |    |     |    |        |    |          |    |                      |    |  |
|                      |                                                                                                              |                                                                                                                                                                                                                                                                                                                                                                                                 |                                                                                     |    |               |    |        |    |           |    |     |    |        |    |          |    |                      |    |  |
| 10                   | Leadership or fiduciary role in other board,                                                                 | <input checked="" type="checkbox"/> <b>None</b><br><table border="1"> <tr><td></td><td></td></tr> </table>                                                                                                                                                                                                                                                                                      |                                                                                     |    |               |    |        |    |           |    |     |    |        |    |          |    |                      |    |  |
|                      |                                                                                                              |                                                                                                                                                                                                                                                                                                                                                                                                 |                                                                                     |    |               |    |        |    |           |    |     |    |        |    |          |    |                      |    |  |

|           |                                                                                  | Name all entities with whom you have this relationship or indicate none (add rows as needed) | Specifications/Comments (e.g., if payments were made to you or to your institution) |
|-----------|----------------------------------------------------------------------------------|----------------------------------------------------------------------------------------------|-------------------------------------------------------------------------------------|
|           | society, committee or advocacy group, paid or unpaid                             |                                                                                              |                                                                                     |
| <b>11</b> | Stock or stock options                                                           | <input checked="" type="checkbox"/> <b>None</b>                                              |                                                                                     |
|           |                                                                                  |                                                                                              |                                                                                     |
| <b>12</b> | Receipt of equipment, materials, drugs, medical writing, gifts or other services | <input checked="" type="checkbox"/> <b>None</b>                                              |                                                                                     |
|           |                                                                                  |                                                                                              |                                                                                     |
| <b>13</b> | Other financial or non-financial interests                                       | <input checked="" type="checkbox"/> <b>None</b>                                              |                                                                                     |
|           |                                                                                  |                                                                                              |                                                                                     |

Please place an "X" next to the following statement to indicate your agreement:

I certify that I have answered every question and have not altered the wording of any of the questions on this form.
